# Supplementary material
Source: publisher site journal article supplement (https://www.dovepress.com/article/609862)
Supplement: Supplementary file 1 [file 609862_Supplementary%20material.docx]

**Supplementary Table 1. Basic characteristics of participants with AD**

|  | N (%) | Knowledge score | | Attitude score | | Practice score | |
| --- | --- | --- | --- | --- | --- | --- | --- |
|  | Mean±SD | P | Mean±SD | P | Mean±SD | P |
| **Total** | n=605 | 4.13±1.24 |  | 35.43±3.89 |  | 28.11±2.94 |  |
| **Age, years** | 54.57±13.11 |  | <0.001 |  | <0.001 |  | <0.001 |
| 18-35 | 56(9.3) | 5.14±1.78 |  | 38.32±3.94 |  | 29.61±2.95 |  |
| 36-45 | 86(14.2) | 4.30±1.14 |  | 37.12±3.44 |  | 29.55±2.54 |  |
| 46-65 | 329(54.4) | 4.11±1.02 |  | 35.54±3.46 |  | 28.24±2.72 |  |
| Over 65 | 134(22.1) | 3.67±1.29 |  | 32.86±3.65 |  | 26.22±2.73 |  |
| **Gender** |  |  | 0.077 |  | 0.361 |  | 0.171 |
| Male | 510(84.3) | 4.17±1.26 |  | 35.49±3.89 |  | 28.18±2.96 |  |
| Female | 95(15.7) | 3.93±1.13 |  | 35.09±3.92 |  | 27.73±2.83 |  |
| **Marital status** |  |  | 0.002 |  | 0.015 |  | 0.024 |
| Unmarried/divorced/ widowed | 71(11.7) | 3.70±1.09 |  | 34.38±4.30 |  | 27.37±2.88 |  |
| Married | 534(88.3) | 4.19±1.25 |  | 35.57±3.82 |  | 28.20±2.94 |  |
| **Residence** |  |  | <0.001 |  | <0.001 |  | 0.011 |
| Rural | 411(67.9) | 3.94±1.09 |  | 35.00±3.82 |  | 27.87±2.84 |  |
| Urban | 158(26.1) | 4.64±1.52 |  | 36.56±3.82 |  | 28.69±3.07 |  |
| Suburban | 36(6.0) | 4.11±1.01 |  | 35.31±4.10 |  | 28.22±3.16 |  |
| **Education** |  |  | <0.001 |  | <0.001 |  | 0.001 |
| Primary school and below | 299(49.4) | 3.82±1.12 |  | 34.76±3.87 |  | 27.69±2.94 |  |
| Junior high school | 182(30.1) | 4.19±0.92 |  | 35.65±3.57 |  | 28.47±2.65 |  |
| High school/technical school | 63(10.4) | 4.48±1.23 |  | 36.83±3.94 |  | 29.14±3.13 |  |
| College/undergraduate and above | 61(10.1) | 5.18±1.88 |  | 36.61±4.25 |  | 27.98±3.23 |  |
| **Employment status** |  |  | 0.001 |  | <0.001 |  | <0.001 |
| Employed with a fixed job | 149(24.6) | 4.44±1.56 |  | 37.11±4.05 |  | 29.02±2.79 |  |
| Unemployed or without a fixed job | 456(75.4) | 4.04±1.11 |  | 34.88±3.68 |  | 27.81±2.93 |  |
| **Average monthly per capita income in your family in the past year, yuan** |  |  | <0.001 |  | <0.001 |  | <0.001 |
| ≤5000 | 240(39.7) | 3.84±1.10 |  | 34.46±3.84 |  | 27.60±2.94 |  |
| 5001-10000 | 221(36.5) | 4.23±1.06 |  | 35.50±3.67 |  | 28.15±2.90 |  |
| >10000 | 144(23.8) | 4.49±1.59 |  | 36.94±3.84 |  | 28.88±2.85 |  |
| **Type of medical insurance** |  |  | <0.001 |  | 0.037 |  | 0.063 |
| Only social medical insurance (e.g., employee medical insurance, "New Rural Cooperative Medical Insurance," "Urban Residents Basic Medical Insurance," etc.) | 593(98.0) | 4.10±1.13 |  | 35.38±3.86 |  | 28.07±2.94 |  |
| Both social medical insurance and commercial medical insurance | 12(2.0) | 5.58±3.78 |  | 37.75±4.73 |  | 29.67±2.77 |  |
| **Smoking** |  |  | 0.120 |  | 0.303 |  | 0.591 |
| Never smoked | 257(42.5) | 4.16±1.47 |  | 35.37±4.37 |  | 28.05±3.02 |  |
| Former smoker, currently quit | 90(14.9) | 3.89±1.17 |  | 34.94±3.67 |  | 27.90±3.33 |  |
| Currently smoking | 258(42.6) | 4.20±1.00 |  | 35.66±3.43 |  | 28.24±2.72 |  |
| **Alcohol consumption** |  |  | 0.654 |  | 0.175 |  | 0.060 |
| Almost never | 233(38.5) | 4.08±1.25 |  | 35.12±3.84 |  | 27.93±2.83 |  |
| Occasionally | 278(46.0) | 4.16±1.27 |  | 35.65±4.06 |  | 28.35±3.03 |  |
| Frequently | 69(11.4) | 4.26±1.09 |  | 35.91±3.42 |  | 28.17±2.94 |  |
| Every day | 25(4.1) | 4.00±1.26 |  | 34.48±3.48 |  | 26.84±2.72 |  |
| **Usual sleep quality** |  |  | <0.001 |  | <0.001 |  | <0.001 |
| Very good | 41(6.8) | 4.76±1.53 |  | 38.71±4.12 |  | 29.85±3.50 |  |
| Quite good | 178(29.4) | 4.29±1.37 |  | 36.79±3.58 |  | 29.20±2.75 |  |
| Average | 257(42.5) | 4.12±1.07 |  | 35.12±3.48 |  | 27.80±2.67 |  |
| Quite poor | 116(19.2) | 3.82±1.19 |  | 33.51±3.46 |  | 26.83±2.63 |  |
| Very poor | 13(2.1) | 3.15±0.90 |  | 29.77±2.89 |  | 25.00±2.86 |  |
| **Duration of hypertension** |  |  | 0.008 |  | 0.828 |  | 0.062 |
| ＜6 months | 229(37.9) | 4.34±1.31 |  | 35.57±3.78 |  | 28.25±2.76 |  |
| ≥6 months, less than one year | 10(1.7) | 3.80±1.23 |  | 35.30±4.08 |  | 29.70±3.56 |  |
| ≥1 year, less than two years | 14(2.3) | 3.86±0.66 |  | 34.64±3.23 |  | 28.86±2.63 |  |
| ≥2 years, less than three years | 26(4.3) | 4.42±1.45 |  | 35.92±5.06 |  | 28.96±2.97 |  |
| ≥3 years | 326(53.9) | 3.99±1.18 |  | 35.33±3.90 |  | 27.86±3.03 |  |
| **Family history of hypertension** |  |  | 0.923 |  | 0.640 |  | 0.504 |
| Yes | 43(7.1) | 4.12±1.35 |  | 35.70±4.90 |  | 28.40±2.85 |  |
| No | 562(92.9) | 4.14±1.24 |  | 35.41±3.81 |  | 28.08±2.95 |  |
| **Family history of aortic dissection** |  |  | 0.898 |  | 0.831 |  | 0.850 |
| Yes | 11(1.8) | 4.18±1.33 |  | 35.18±3.31 |  | 28.27±1.85 |  |
| No | 594(98.2) | 4.13±1.24 |  | 35.43±3.91 |  | 28.10±2.96 |  |

**Supplementary Table 2. Direct and indirect effects of path analysis in participants with AD**

| **Model paths** | | Total effects | |  | Direct Effect | |  | Indirect effect | |
| --- | --- | --- | --- | --- | --- | --- | --- | --- | --- |
| β (95%CI) | P |  | β (95%CI) | P |  | β (95%CI) | P |
| Attitude |  |  |  |  |  |  |  |  |  |
|  | Knowledge | 0.328 (0.259, 0.397) | <0.001 |  | 0.328 (0.259, 0.397) | <0.001 |  |  |  |
| Practice |  |  |  |  |  |  |  |  |  |
|  | Knowledge | 0.186 (0.109, 0.262) | <0.001 |  | 0.038 (-0.037, 0.112) | 0.323 |  | 0.148 (0.109, 0.187) | <0.001 |
|  | Attitude | 0.451 (0.383, 0.518) | <0.001 |  | 0.451 (0.383, 0.518) | <0.001 |  |  |  |

**Figure S1**


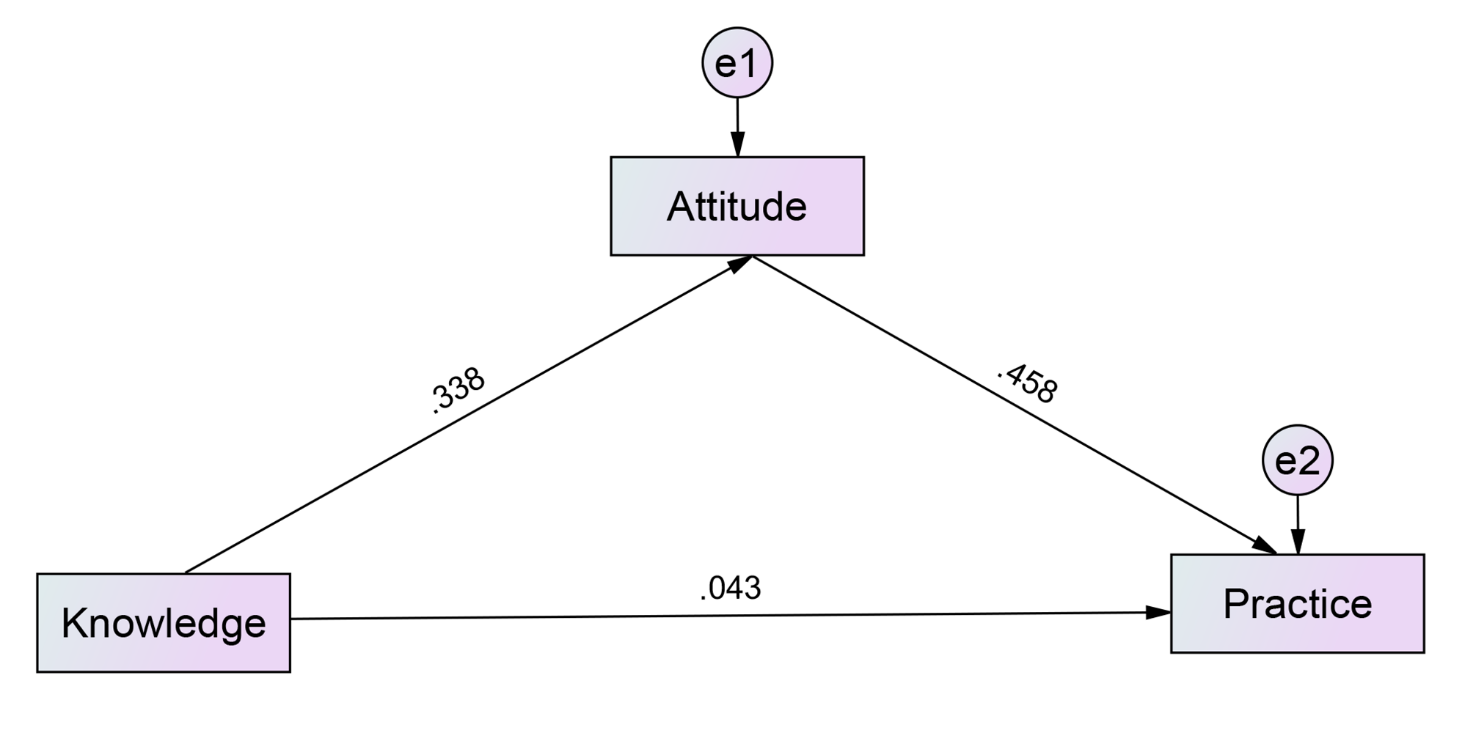


**Figure S1. Mediation analysis illustrating the relationships between knowledge, attitudes, and practices. The arrows indicate direct and indirect effects, with standardized path coefficients shown. K: Knowledge, A: Attitudes, P: Practices.**

**Supplementary Figure 2

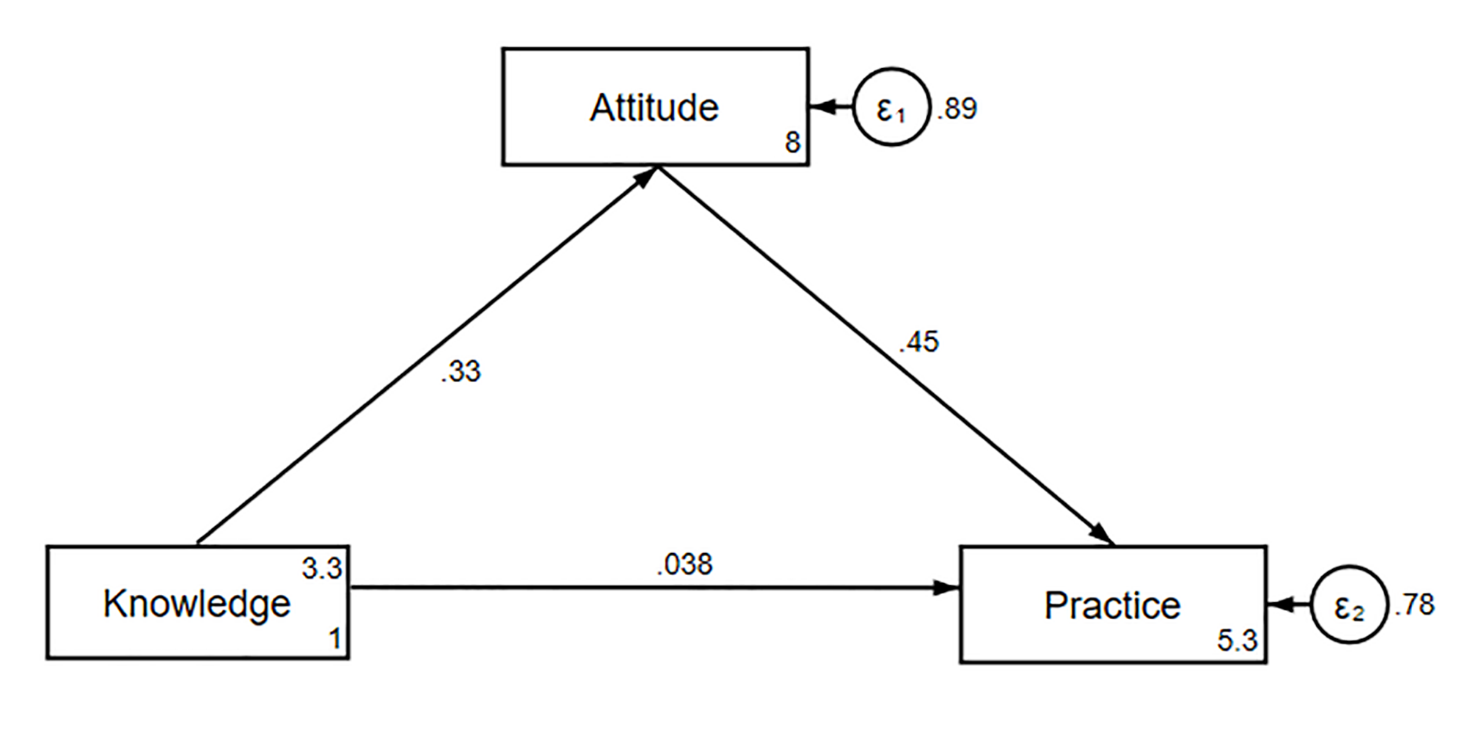
**

**Supplementary Figure 2. Mediation analysis of the relationships among knowledge, attitudes, and practices in the subgroup of patients with confirmed aortic dissection. Standardized path coefficients are shown. Knowledge had a significant indirect effect on practices through attitudes, while the direct path from knowledge to practices was not statistically significant, indicating a full mediation effect of attitudes.**

| **Supplement file**  **Knowledge, Attitudes, and Practices of Hypertensive Patients with Aortic Dissection towards AD and its Prevention** | | | |
| --- | --- | --- | --- |
| **Part I Basic Information** | | | |
| **1.** **Gender** | | a. Male  b. Female |  |
| **2.Your age** | | a. 18-35  b. 36-45  c. 46-65  d. Over 65 | |
| **3.** **Marital status** | | a. Unmarried  b. Married  c. Divorced  d. Widowed | |
| **4.** **Residence** | | a. Rural  b. Urban  c. Suburban | |
| **5.** **Education** | | a. Primary school and below  b. Junior high school  c. High School/Technical school  d. College/undergraduate and above | |
| **6.** **Employment status** | | a. Employed with a fixed job  b. Unemployed or without a fixed job | |
| **7.** **Average monthly per capita income in your family in the past year, yuan** | | a. ≤5000  b. 5001-10000  c. >10000 | |
| **8.** **Type of medical insurance** | | a. Only social medical insurance (e.g., employee medical insurance, "New Rural Cooperative Medical Insurance," "Urban Residents Basic Medical Insurance," etc.)  b. Both social medical insurance and commercial medical insurance | |
| **9.** **Smoking** | | a. Never smoked  b. Former smoker, currently quit  c. Currently smoking | |
| **10.** **Alcohol consumption** | | a. Almost never  b. Occasionally  c. Frequently  d. Every day | |
| **11.** **Usual sleep quality** | | a. Very good  b. Quite good  c. Average  d. Quite poor  e. Very poor | |
| **12.** **Duration of hypertension** | | a. <6 months  b. ≥6 months, less than one yea  c. ≥1 year, less than two years  d. ≥2 years, less than three years  e. ≥3 years | |
| **13. Family history of hypertension** | | a. Yes  b. No | |
| **14.** **Family history of aortic dissection** | | a. Yes  b. No | |

**Part II Knowledge**

| **K1. Do you know what aortic dissection is?**  (Explanation: Aortic dissection refers to the tearing of the inner layer of the aorta, with blood flowing through the opening, causing separation of the aortic intima and media.) | a. Never heard of/Not familiar | b. Heard of it but not familiar or have little understanding | c. Quite familiar or very familiar |
| --- | --- | --- | --- |
| **K2. Aortic dissection is a highly dangerous cardiovascular disease, and hypertension is one of the main risk factors for aortic dissection.** | a. Never heard of/Not familiar | b. Heard of it but not familiar or have little understanding | c. Quite familiar or very familiar |
| **K3. Besides hypertension, other risk factors for aortic dissection include smoking, atherosclerosis, and family inheritance.** | a. Never heard of/Not familiar | b. Heard of it but not familiar or have little understanding | c. Quite familiar or very familiar |
| **K4. Hypertensive patients need to undergo long-term antihypertensive treatment and maintain blood pressure below the target level (140/90 mmHg), which is an important measure to prevent aortic dissection.** | a. Never heard of/Not familiar | b. Heard of it but not familiar or have little understanding | c. Quite familiar or very familiar |
| **K5. In addition to controlling hypertension, prevention of aortic dissection includes quitting smoking, engaging in regular exercise, maintaining healthy dietary habits, and undergoing regular check-ups.** | a. Never heard of/Not familiar | b. Heard of it but not familiar or have little understanding | c. Quite familiar or very familiar |
| **K6. Hypertensive patients should pay attention to diet and weight control, avoiding a high-salt, high-fat, high-cholesterol diet.** | a. Never heard of/Not familiar | b. Heard of it but not familiar or have little understanding | c. Quite familiar or very familiar |
| **K7. Prevention of aortic dissection also involves avoiding strenuous exercise or heavy physical labor to prevent triggering the condition.** | a. Never heard of/Not familiar | b. Heard of it but not familiar or have little understanding | c. Quite familiar or very familiar |
| **K8. Common symptoms of aortic dissection include chest pain, back pain, difficulty breathing, and loss of consciousness. The severe pain experienced by hypertensive patients during an onset may further elevate blood pressure.** | a. Never heard of/Not familiar | b. Heard of it but not familiar or have little understanding | c. Quite familiar or very familiar |
| **K9. Various causes can lead to acute chest pain, including acute myocardial infarction, aortic dissection, acute pulmonary embolism, tension pneumothorax, and other high-risk chest pains. It also includes stable angina, gastroesophageal reflux disease, intercostal neuralgia, neurogenic functional chest pain, and other low to moderate risk chest pains.** | a. Never heard of/Not familiar | b. Heard of it but not familiar or have little understanding | c. Quite familiar or very familiar |
| **K10. High-risk acute chest pain, if not promptly treated, can be life-threatening. Therefore, hypertensive patients or those with heart disease, if suddenly experiencing chest tightness, chest pain, difficulty breathing, etc., should immediately call 120 for medical attention.** | a. Never heard of/Not familiar | b. Heard of it but not familiar or have little understanding | c. Quite familiar or very familiar |
| **K11. Surgical and interventional treatment is the most important treatment for aortic dissection. However, even after surgery and recovery, complications such as new dissections, organ ischemia, aneurysm formation, or rupture may occur.** | a. Never heard of/Not familiar | b. Heard of it but not familiar or have little understanding | c. Quite familiar or very familiar |

**Part III Attitude**

| **A1. Aortic dissection is a highly dangerous disease, and hypertensive patients should take active measures to prevent it.** | a. Strongly agree | b. Agree | c. Neutral | d. Disagree | e. Strongly disagree |
| --- | --- | --- | --- | --- | --- |
| **A2. Hypertension and aortic dissection are genetic, and there's nothing I can do about it.** | a. Strongly agree | b. Agree | c. Neutral | d. Disagree | e. Strongly disagree |
| **A3. I believe the effectiveness of preventive measures for aortic dissection is uncertain and requires time and effort.** | a. Strongly agree | b. Agree | c. Neutral | d. Disagree | e. Strongly disagree |
| **A4. Hypertensive medication needs to be taken for a lifetime, and I worry about the side effects, so I don't want to undergo drug treatment.** | a. Strongly agree | b. Agree | c. Neutral | d. Disagree | e. Strongly disagree |
| **A5. Taking medication for hypertension every day is troublesome, and it creates an economic burden for the family, so I am unwilling to undergo drug treatment.** | a. Strongly agree | b. Agree | c. Neutral | d. Disagree | e. Strongly disagree |
| **A6. I believe the importance of controlling blood pressure in preventing aortic dissection is:** | a. Strongly agree | b. Agree | c. Neutral | d. Disagree | e. Strongly disagree |
| **A7. I believe maintaining a good and positive mindset is important for controlling blood pressure and preventing aortic dissection.** | a. Strongly agree | b. Agree | c. Neutral | d. Disagree | e. Strongly disagree |
| **A8. I believe quitting smoking and avoiding secondhand smoke are important for controlling blood pressure and preventing aortic dissection.** | a. Strongly agree | b. Agree | c. Neutral | d. Disagree | e. Strongly disagree |
| **A9. I believe a low-salt, low-fat healthy diet is important for controlling blood pressure and preventing aortic dissection.** | a. Strongly agree | b. Agree | c. Neutral | d. Disagree | e. Strongly disagree |
| **A10. I believe moderate exercise is important for controlling blood pressure and preventing aortic dissection.** | a. Strongly agree | b. Agree | c. Neutral | d. Disagree | e. Strongly disagree |

**Part Ⅳ Practice**

| **P1. I know I should follow a low-salt, low-fat healthy diet, but I always find it challenging to control myself.** | a. Very consistent | b. Consistent | c. Moderate | d. Inconsistent | e. Very inconsistent |
| --- | --- | --- | --- | --- | --- |
| **P2. I know I should engage in moderate exercise, but I always have difficulty sticking to it.** | a. Very consistent | b. Consistent | c. Moderate | d. Inconsistent | e. Very inconsistent |
| **P3. After discovering hypertension, I started quitting smoking or avoiding secondhand smoke as much as possible.** | a. Very consistent | b. Consistent | c. Moderate | d. Inconsistent | e. Very inconsistent |
| **P4. I will follow the doctor's advice and go for regular follow-up appointments at the hospital.。** | a. Very consistent | b. Consistent | c. Moderate | d. Inconsistent | e. Very inconsistent |
| **P5. If suddenly experiencing chest tightness, chest pain, difficulty breathing, etc., I will immediately call 120 for medical attention.** | a. Very consistent | b. Consistent | c. Moderate | d. Inconsistent | e. Very inconsistent |
| **P6. Currently, I measure my blood pressure frequency:** | a. Always (measure every day) | b. Often (measure every 2-3 days) | c. Sometimes (measure every 4-5 days) | d. Rarely (measure every 6-7 days) | e. Never (measure once every more than 7 days) |
| **P7. During follow-ups, if the doctor recommends it, I will undergo relevant examinations.** | a. Very consistent | b. Consistent | c. Moderate | d. Inconsistent | e. Very inconsistent |
| **P8. I will actively consult with the doctor about controlling blood pressure and preventive measures for aortic dissection.** | a. Very consistent | b. Consistent | c. Moderate | d. Inconsistent | e. Very inconsistent |
